# Supplementary material for: LncRNA MALAT1 Drives Diabetic Kidney Injury via Nrf2 Suppression in Glomerular Endothelium
Source: Research Square preprint supplement (doi:10.21203/rs.3.rs-8249151/v1), 2026-01-21

**葡萄糖摄取检测：**


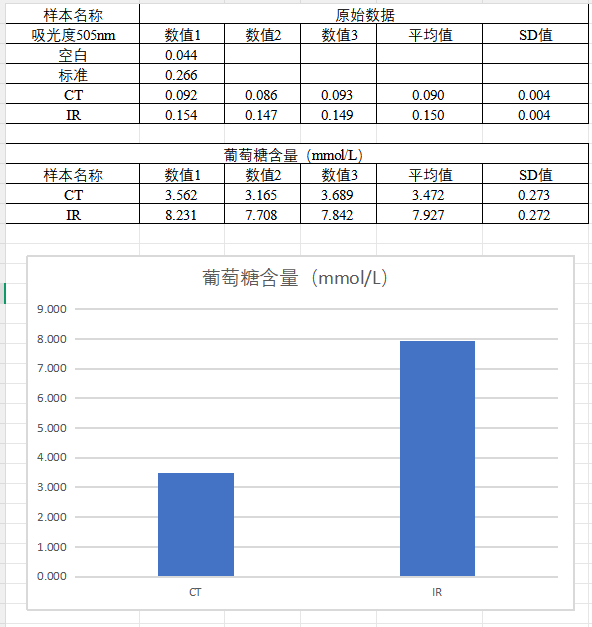


**敲低效率验证：**


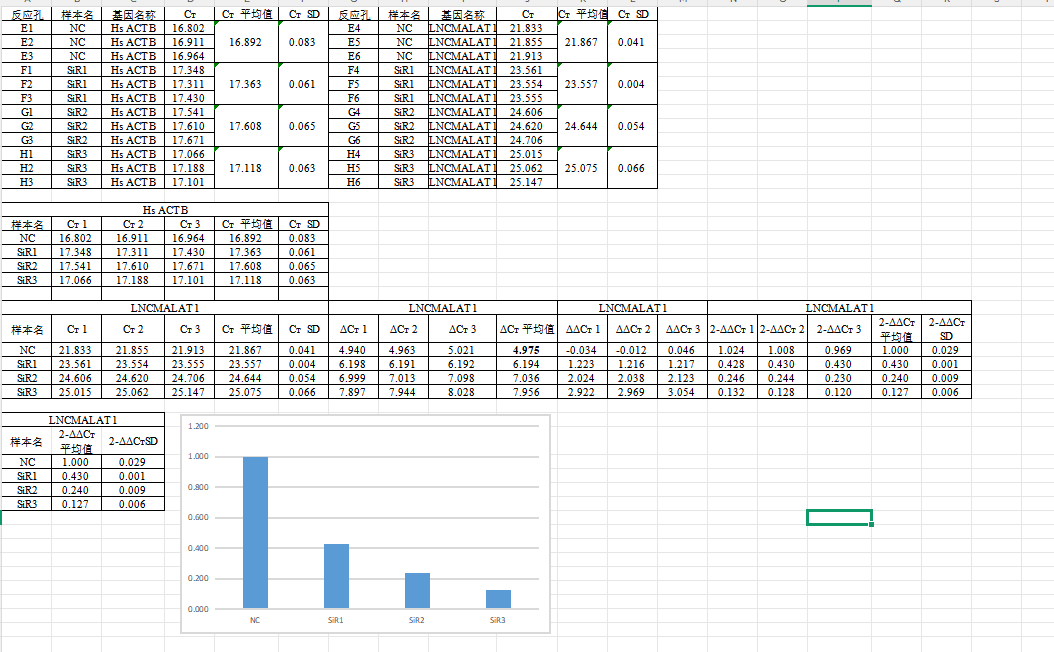


WB结果整理

3组上样顺序：NC-IR+MKD-IR;

5组上样顺序：NC-IR-IR+MKD-IR+MKD+ML385-IR+SFN

2组上样顺序：NC-IR

1. β-actin：42KDa


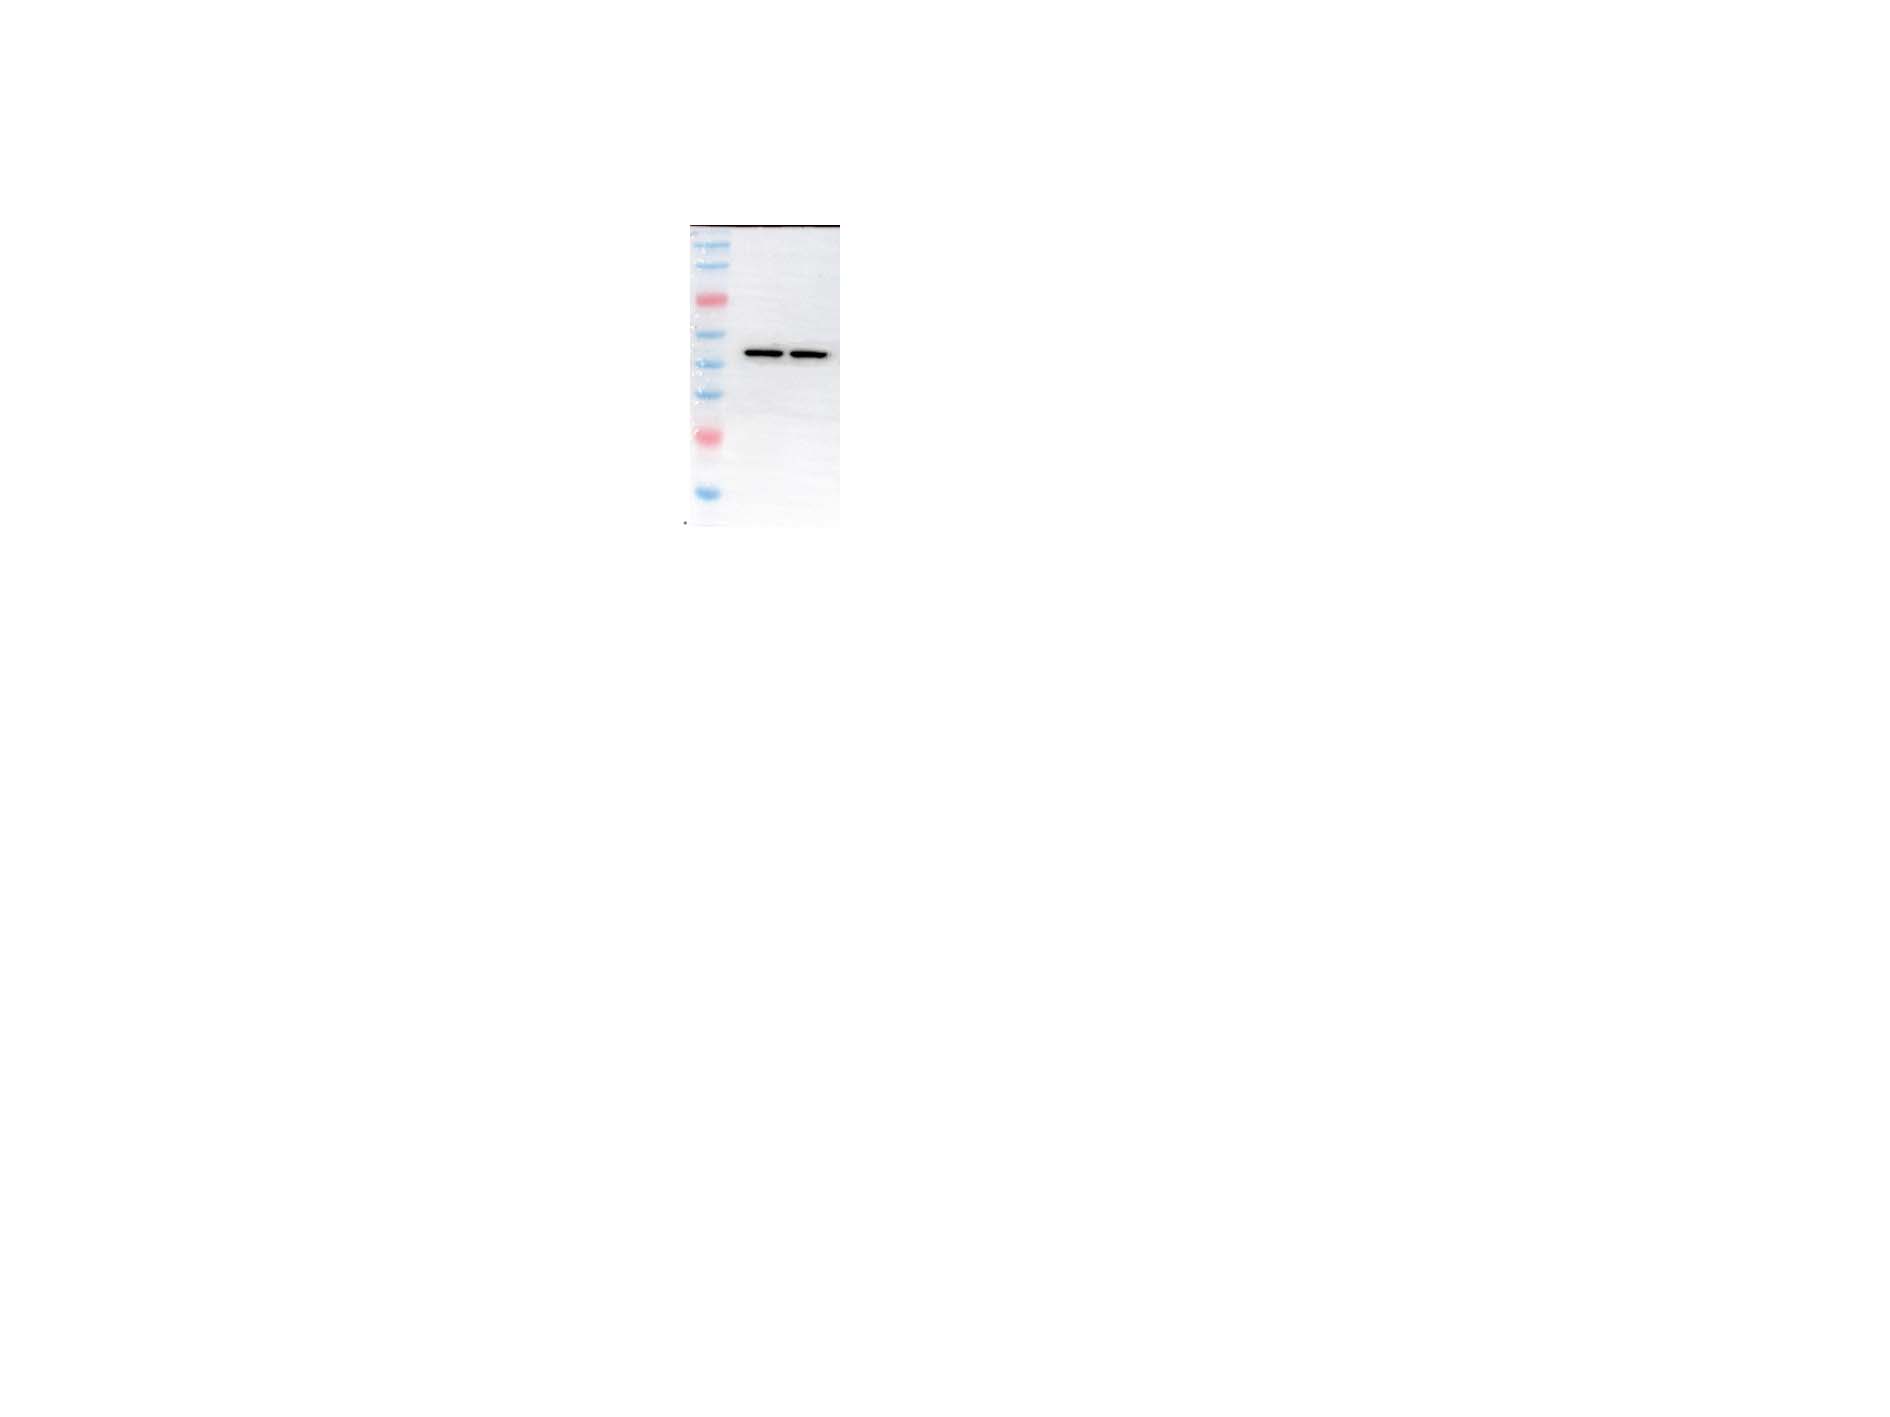

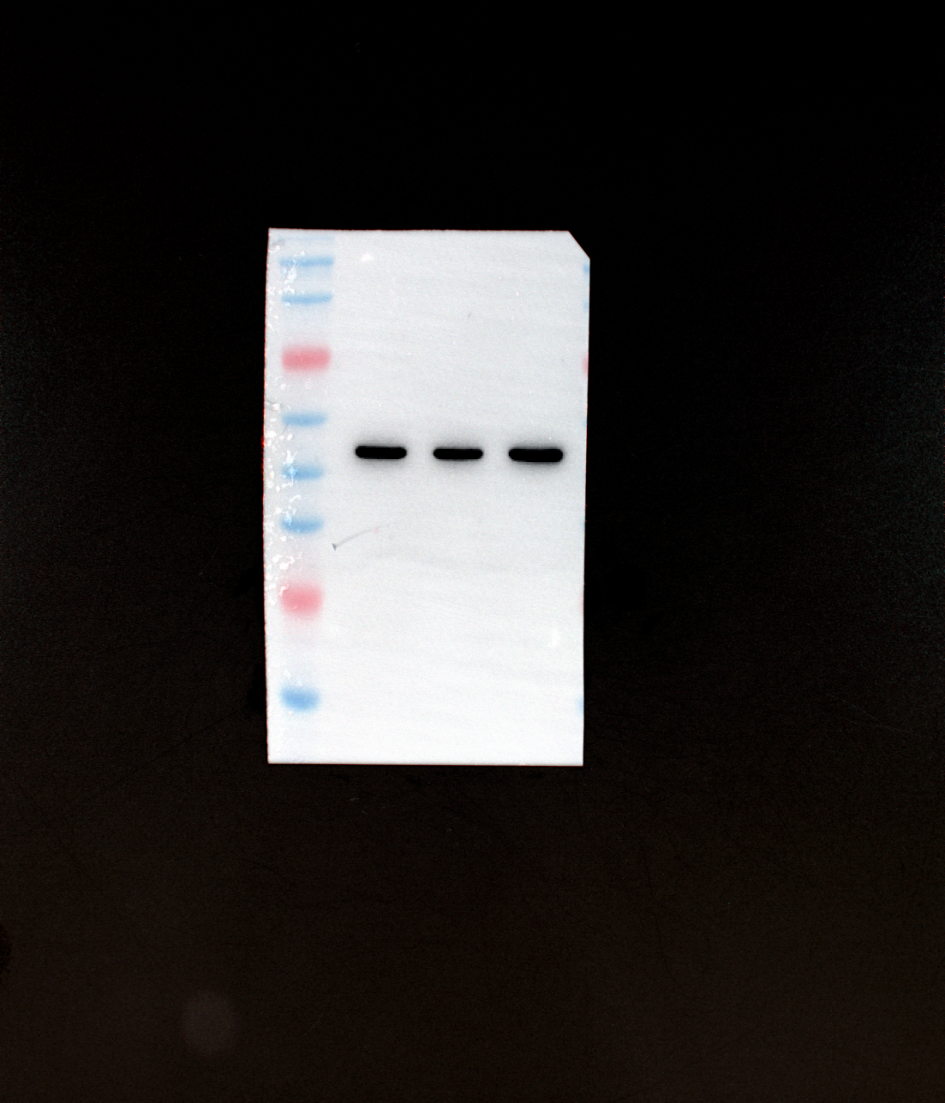

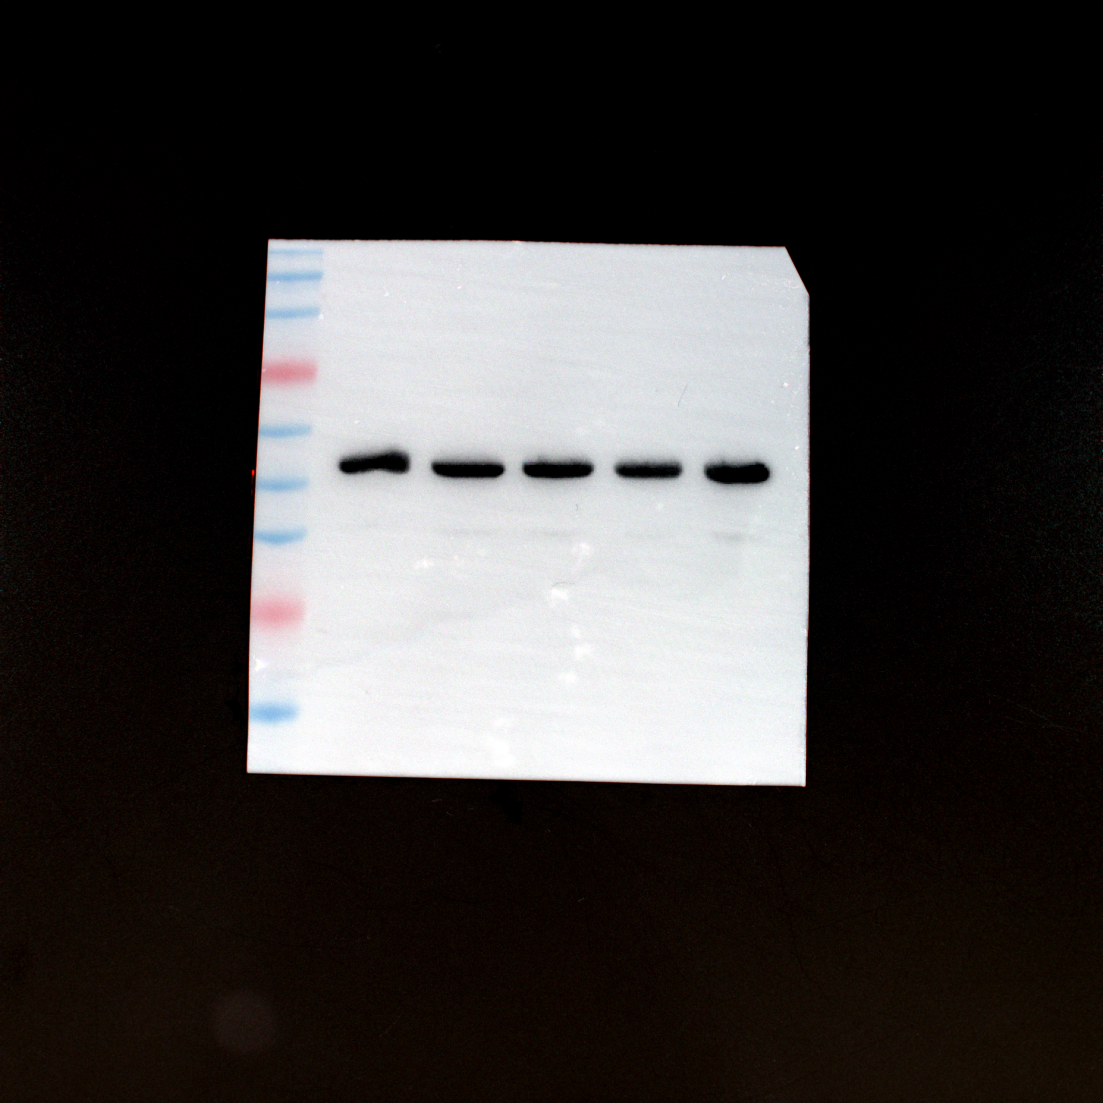


42KDa

1. Bax：21KDa


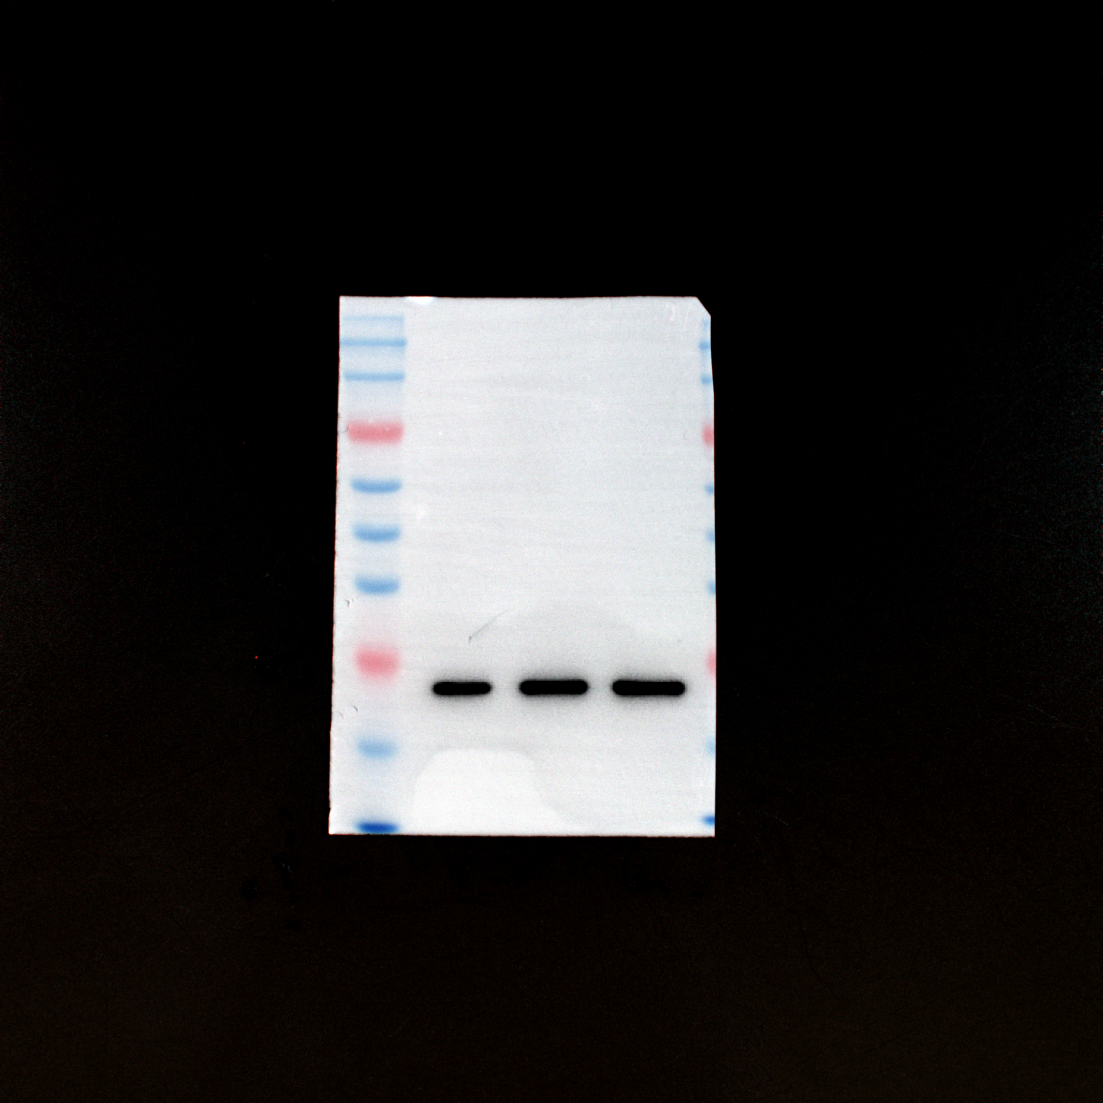
NC
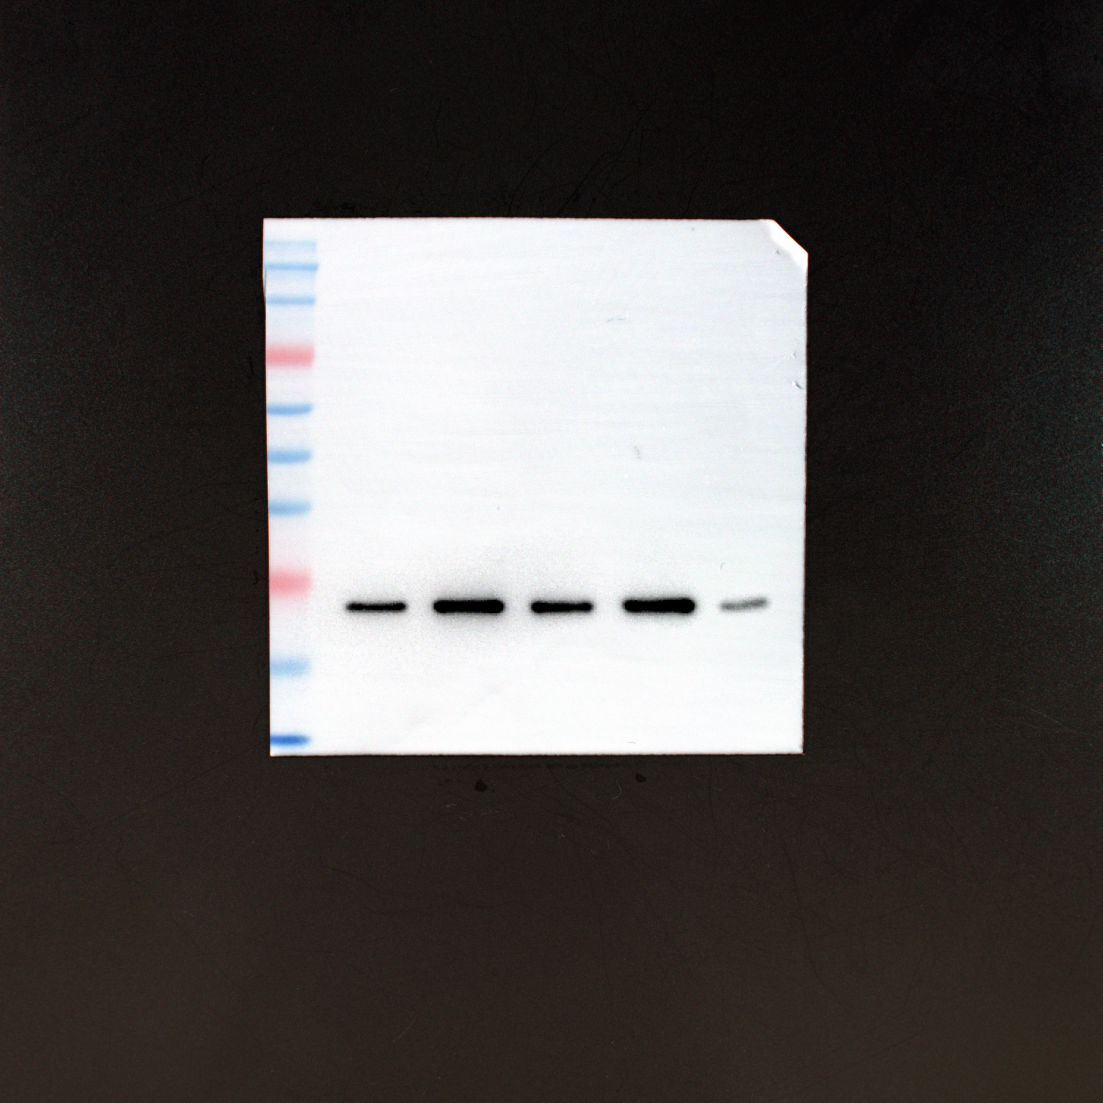


21KDa

1. Bcl2：26KDa


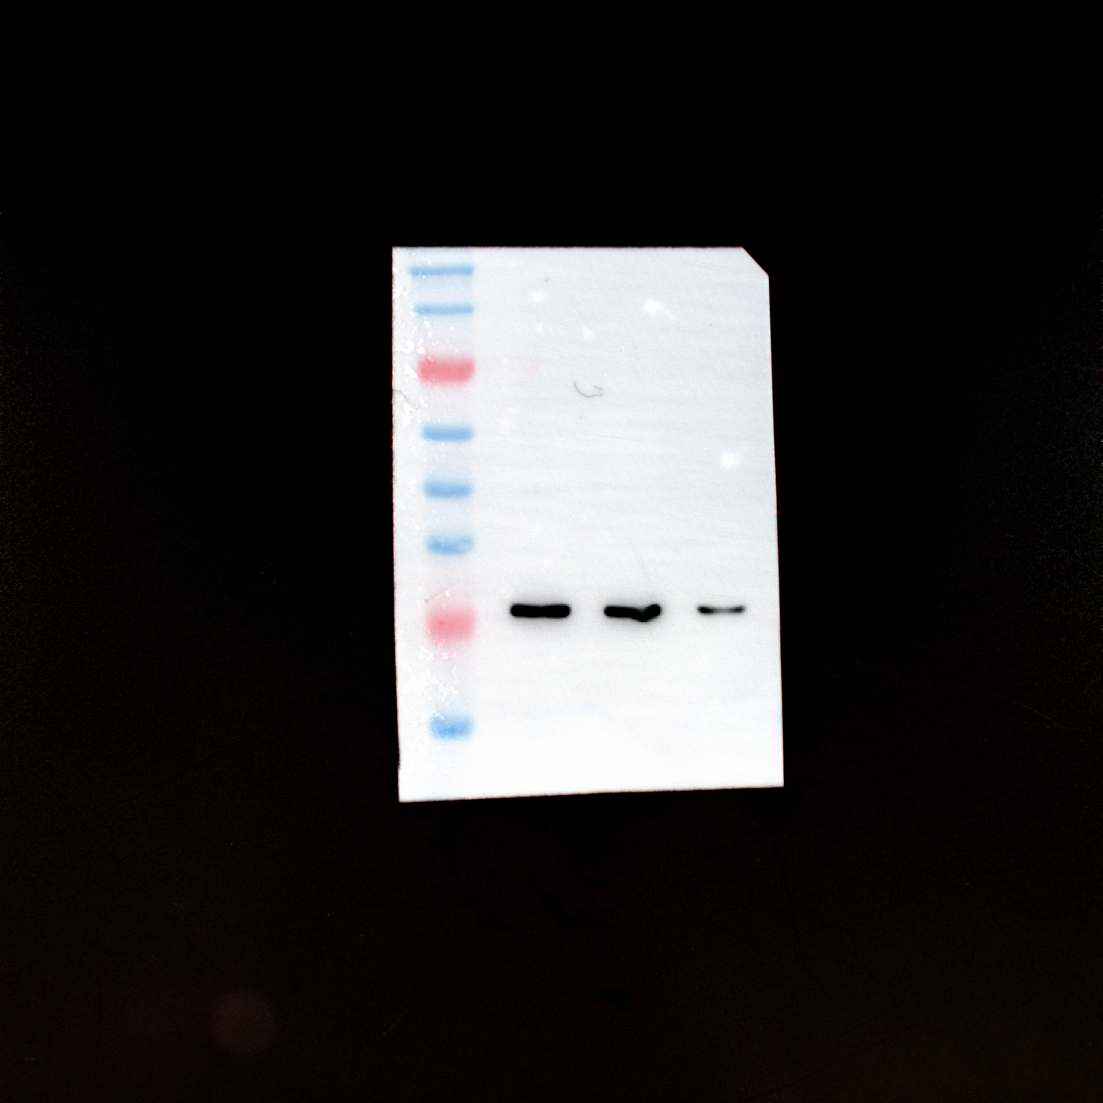

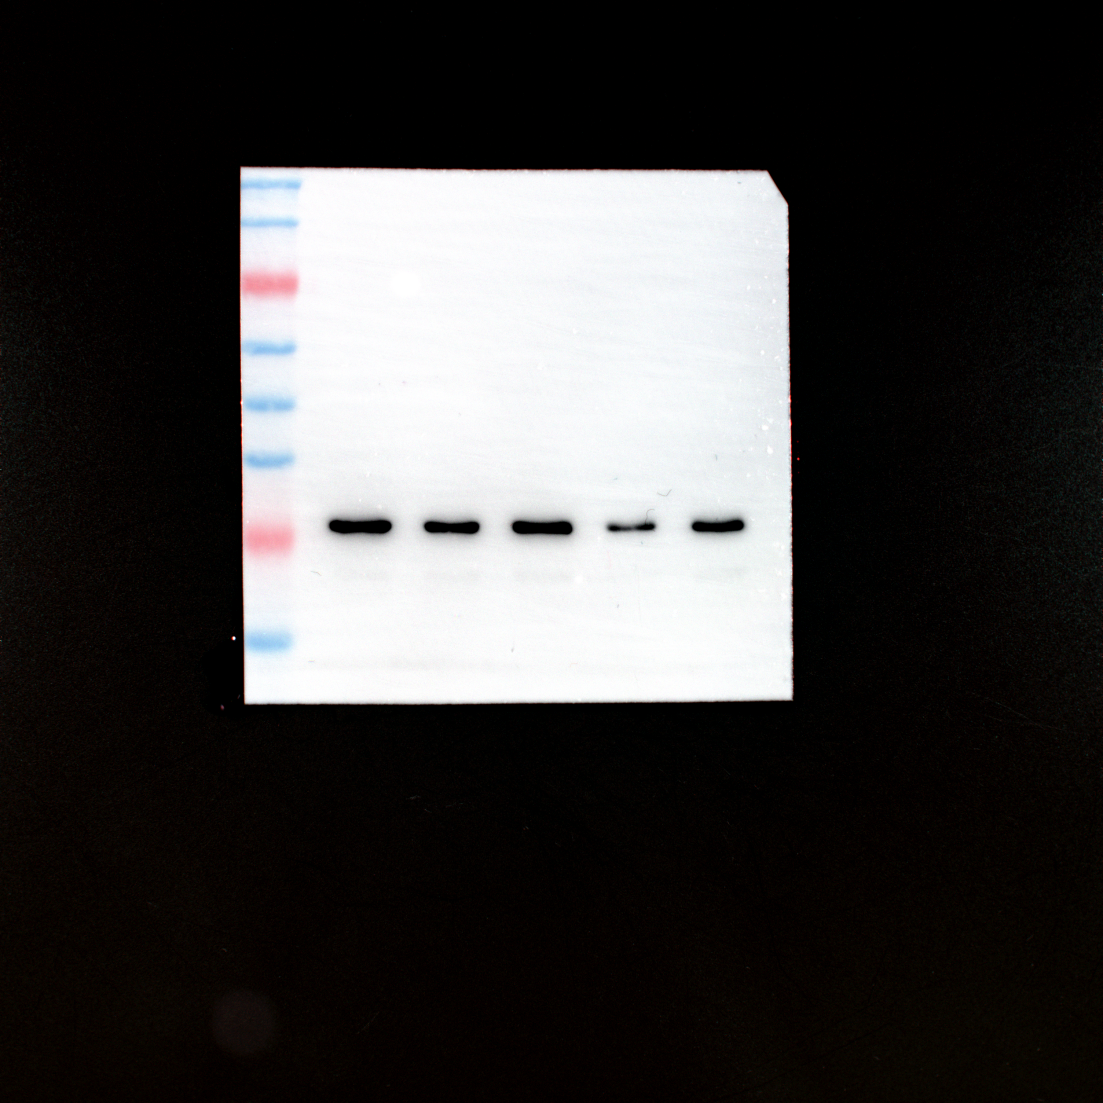


26KDa

4.Cleaved Caspase3：17-25,32KDa


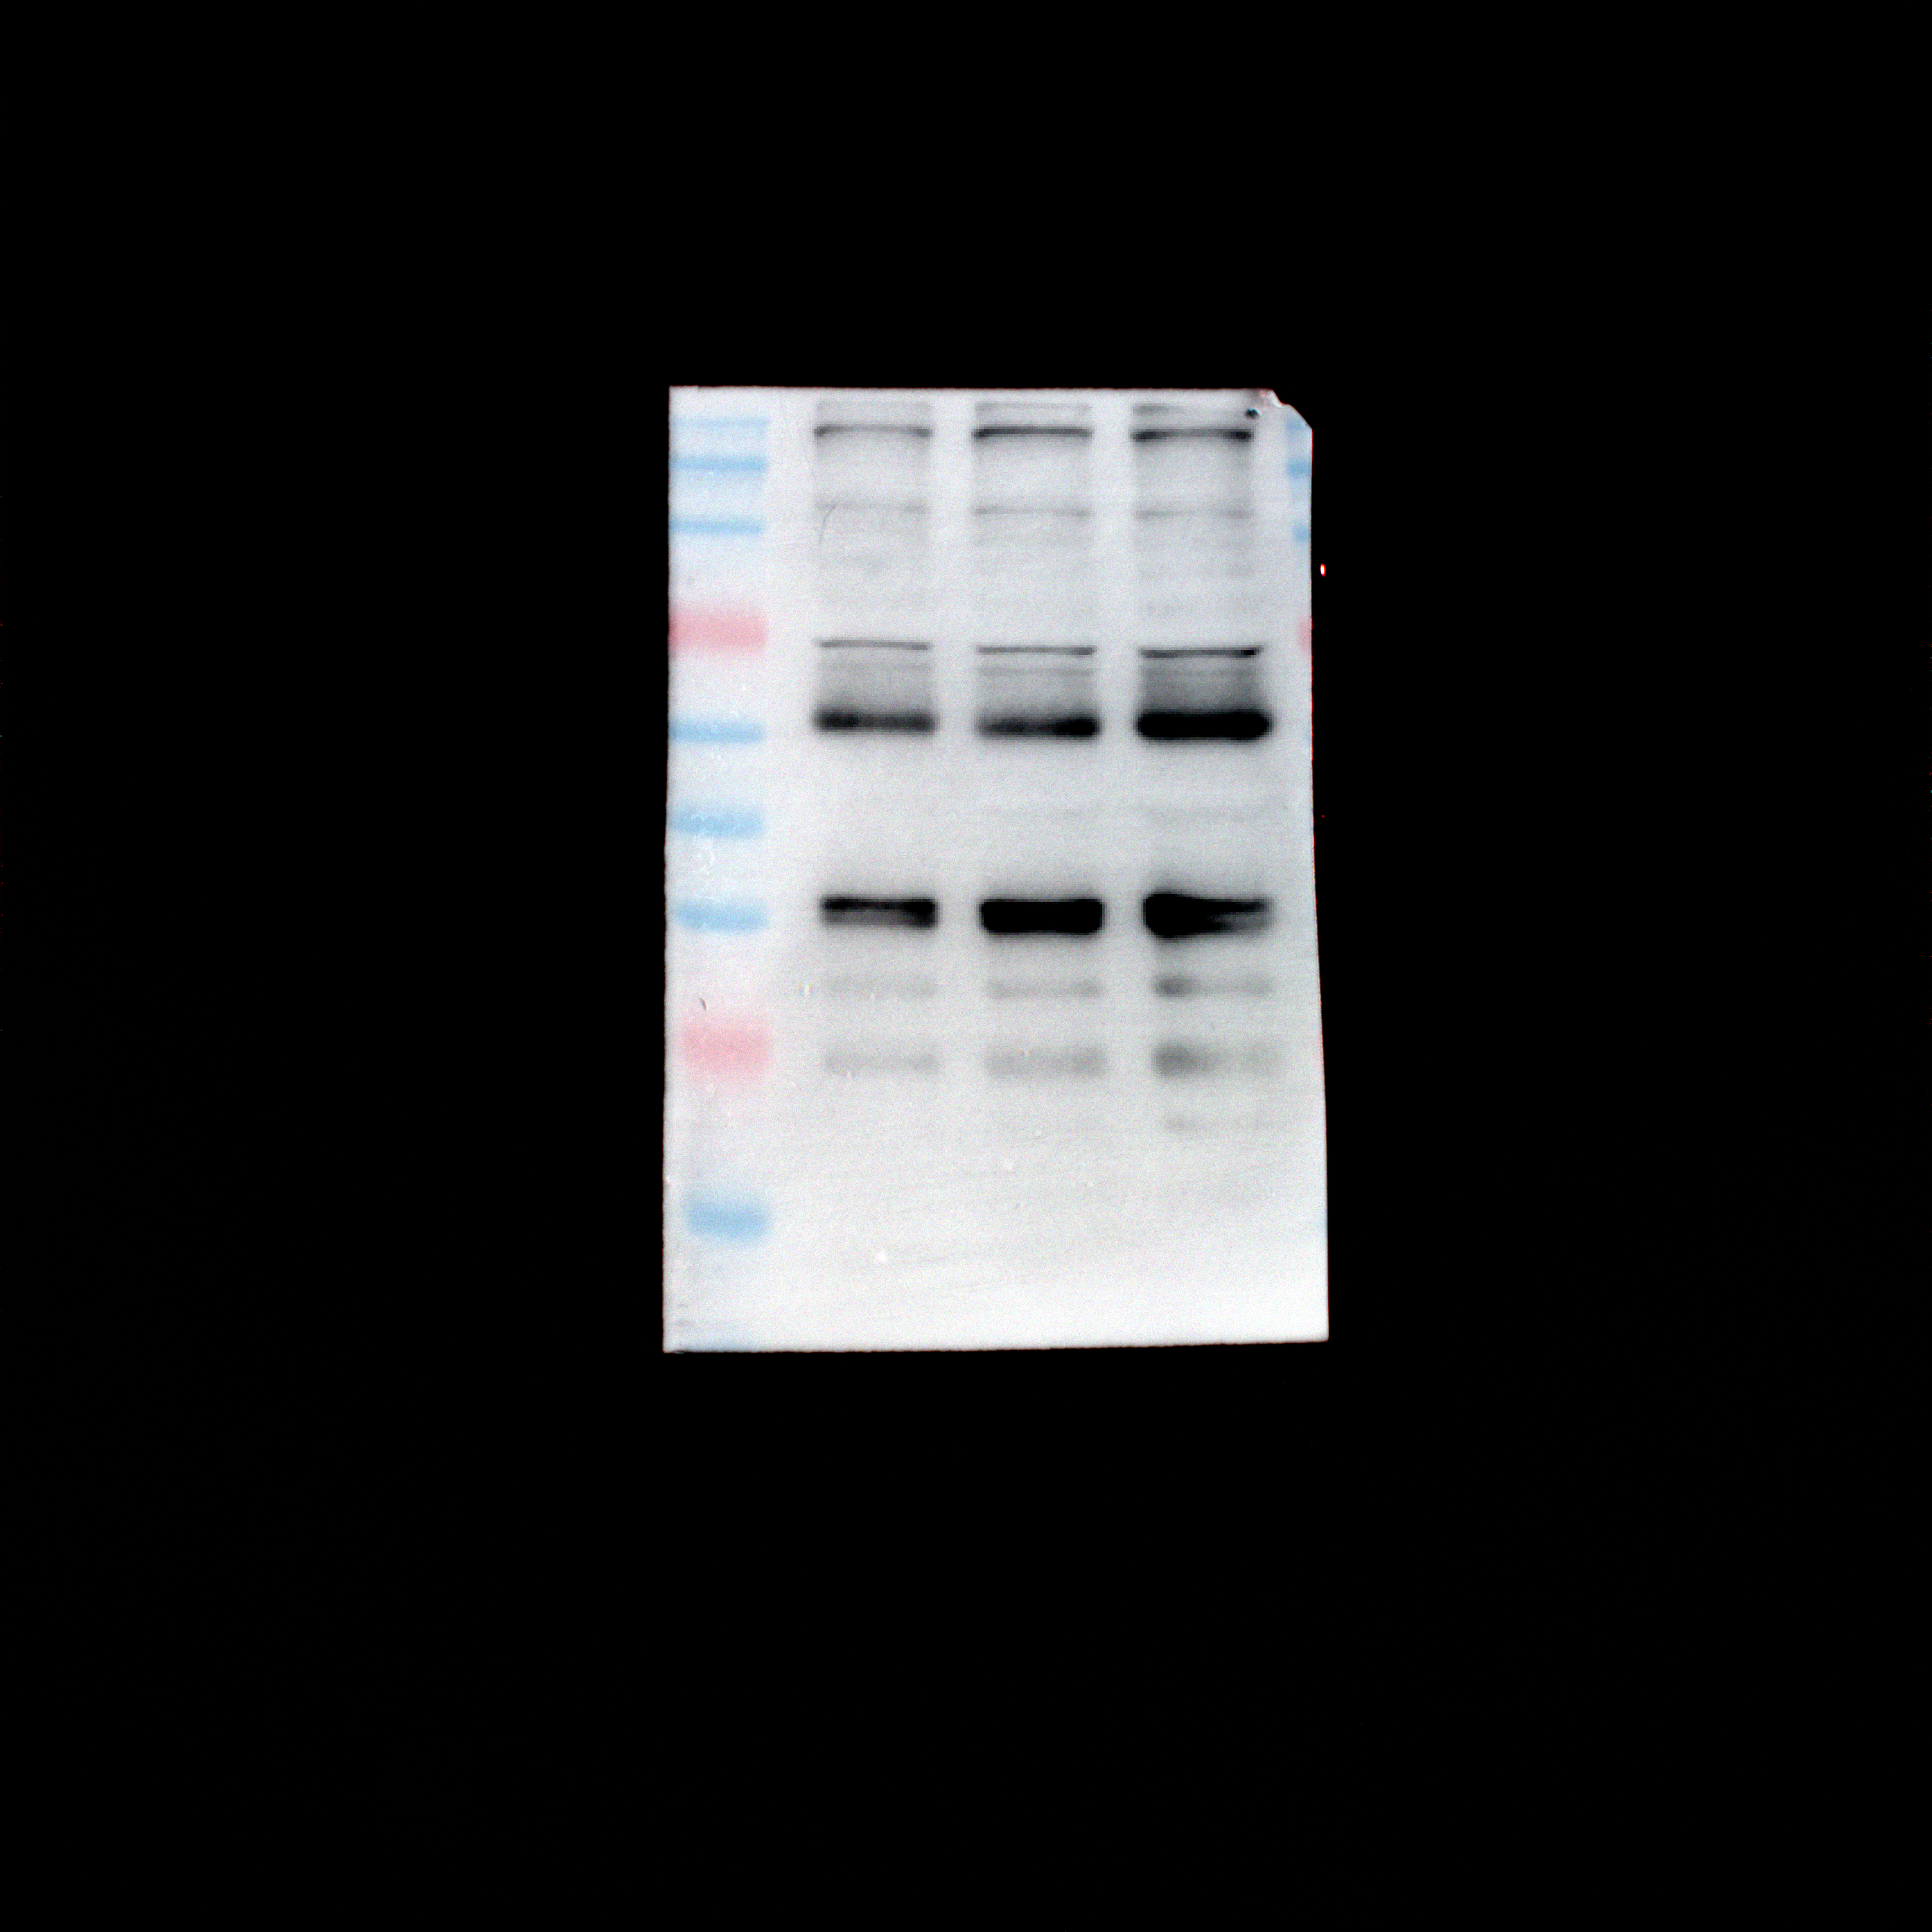

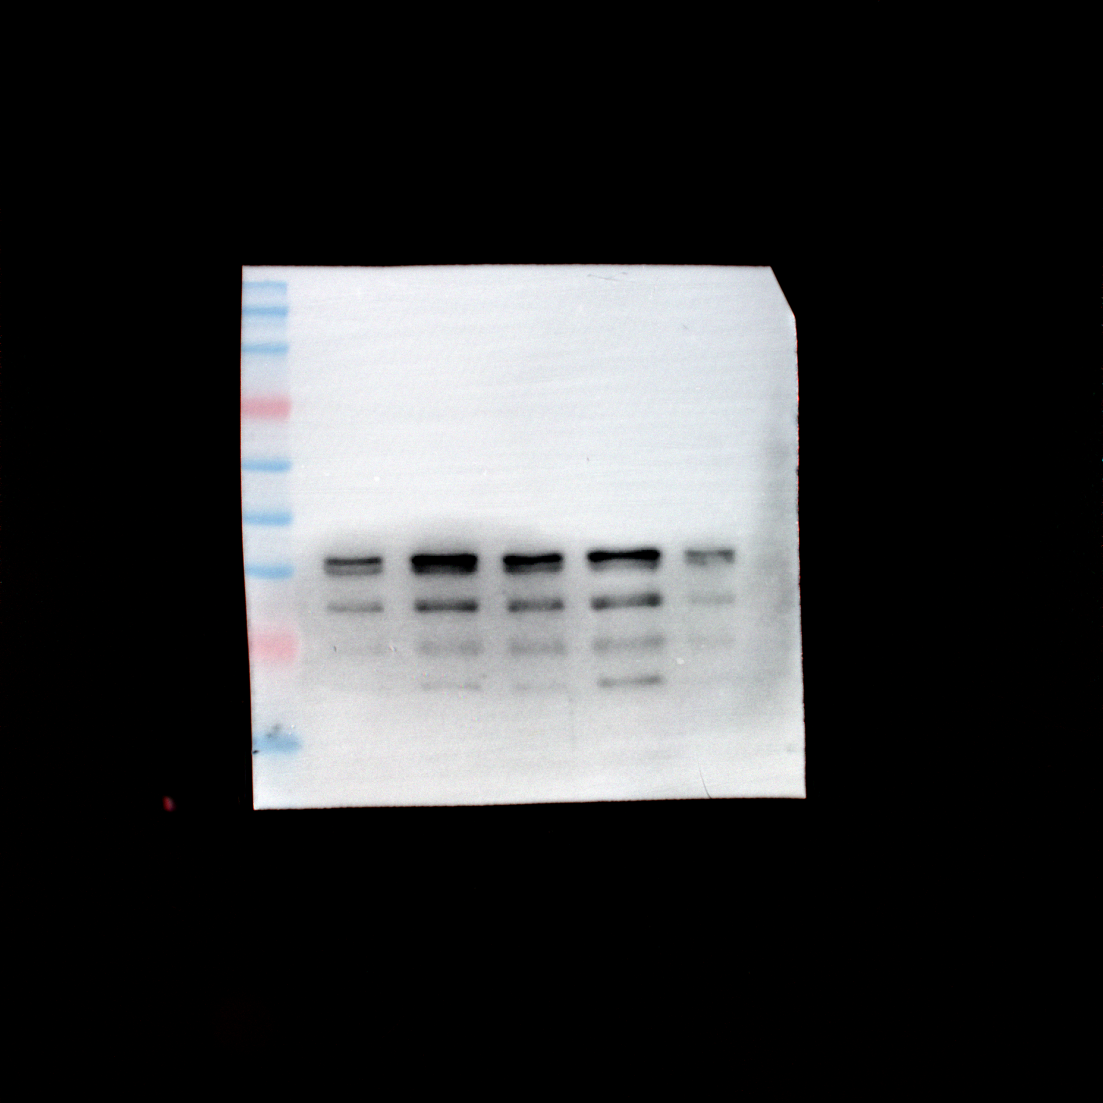


32KDa

5.GPX1：22KDa


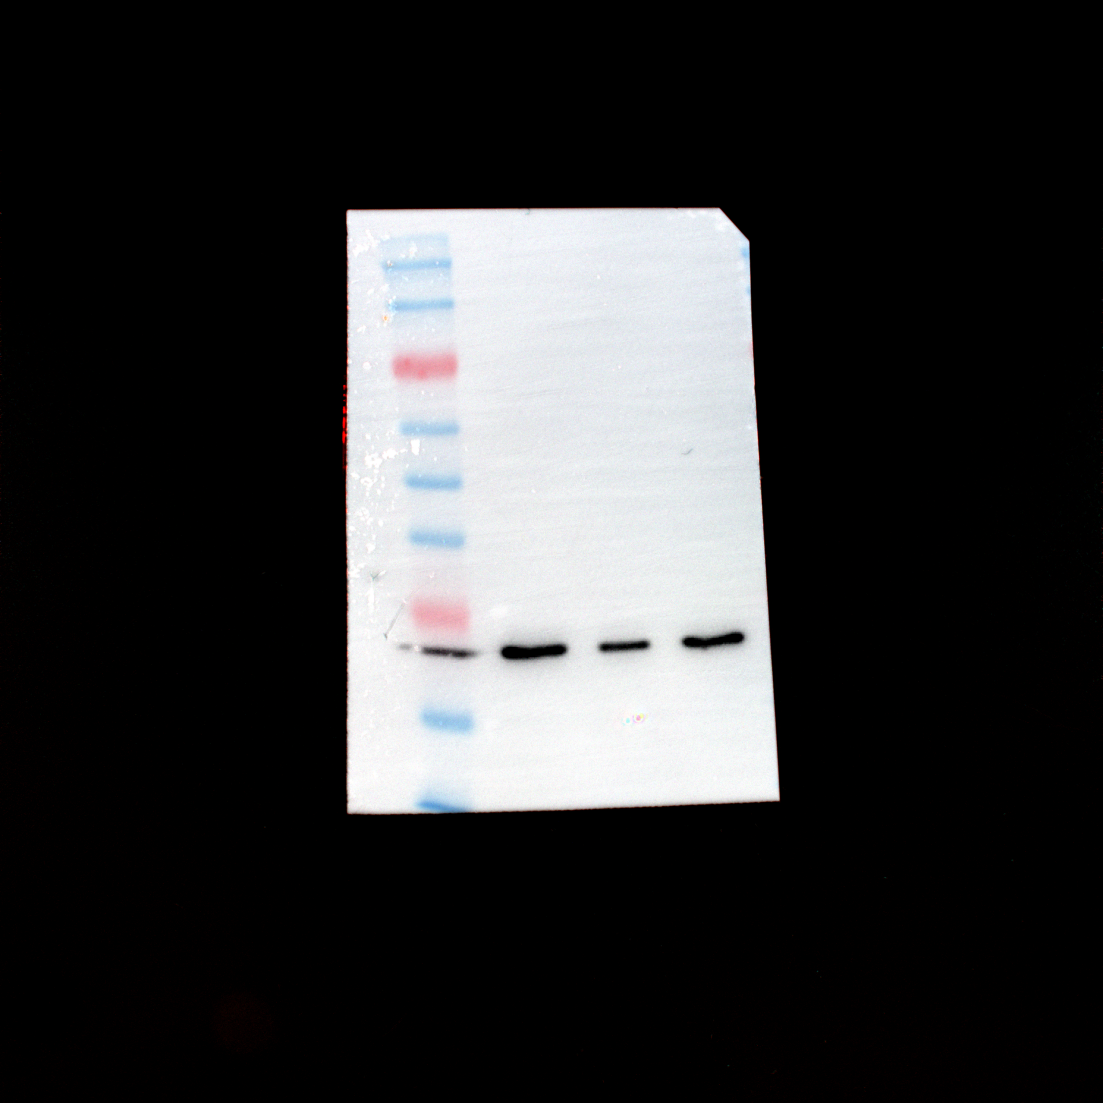

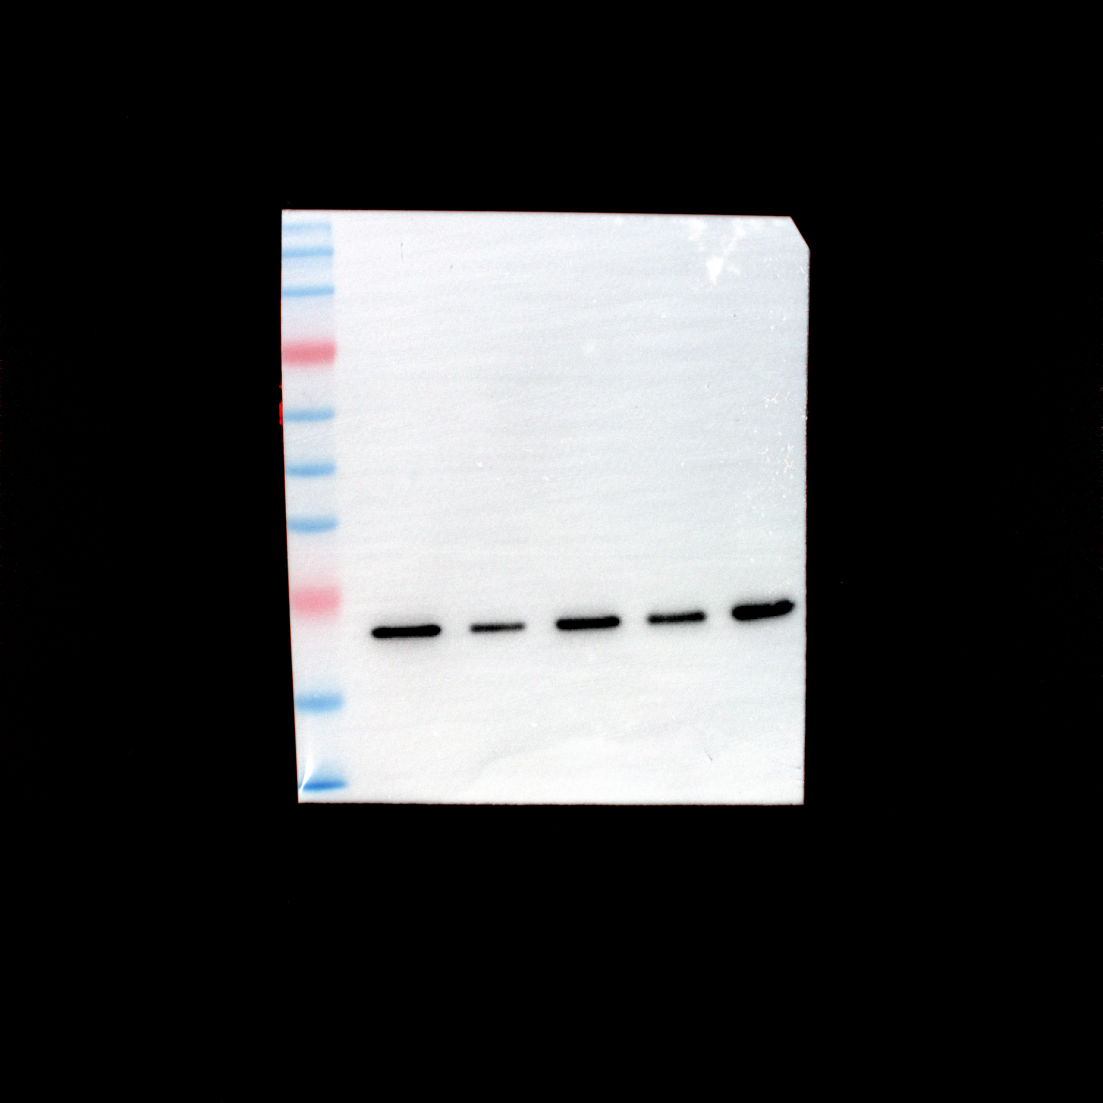


22KDa

5.p-AKT：60-62KDa


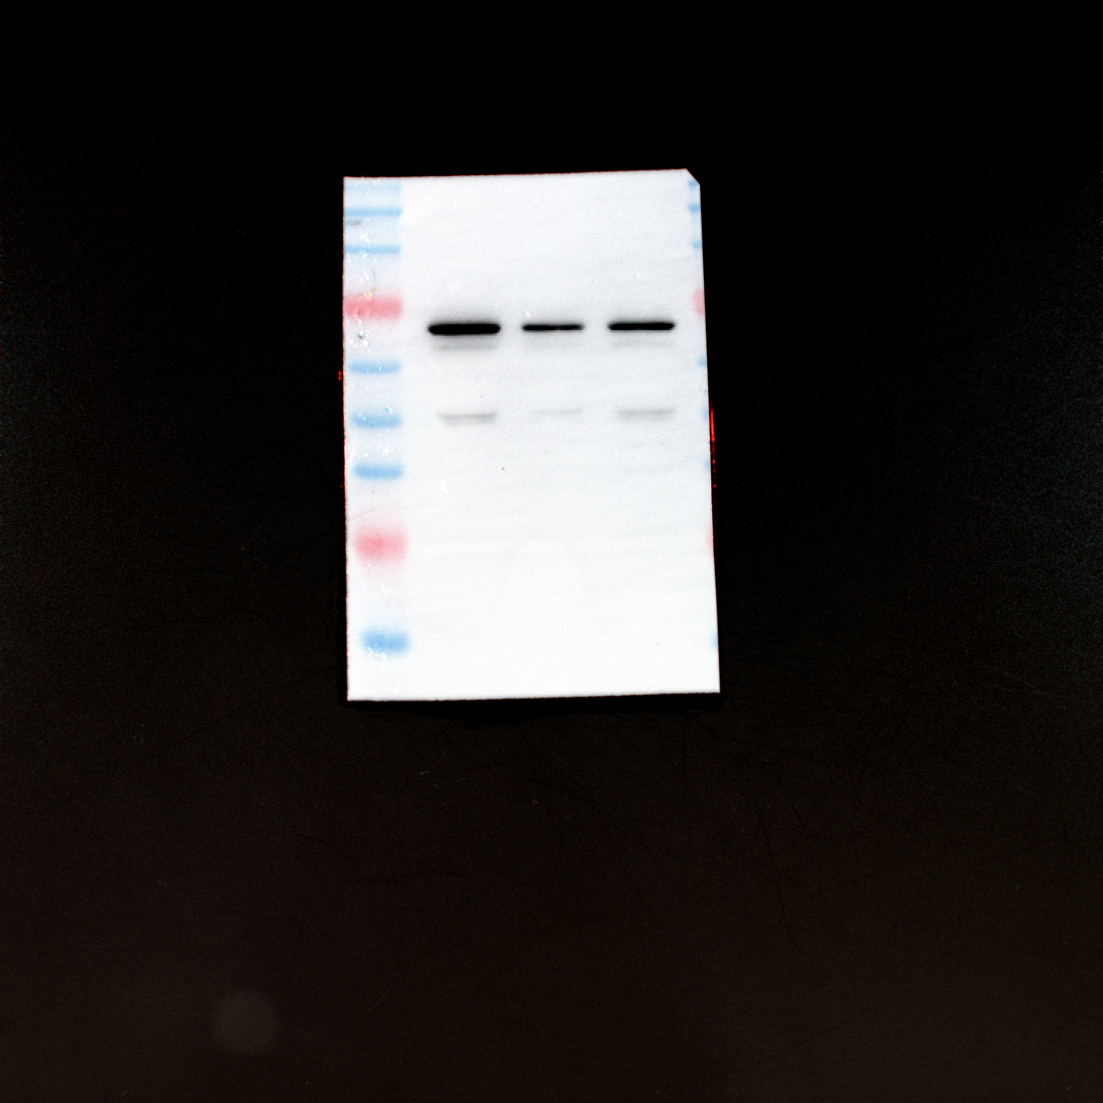

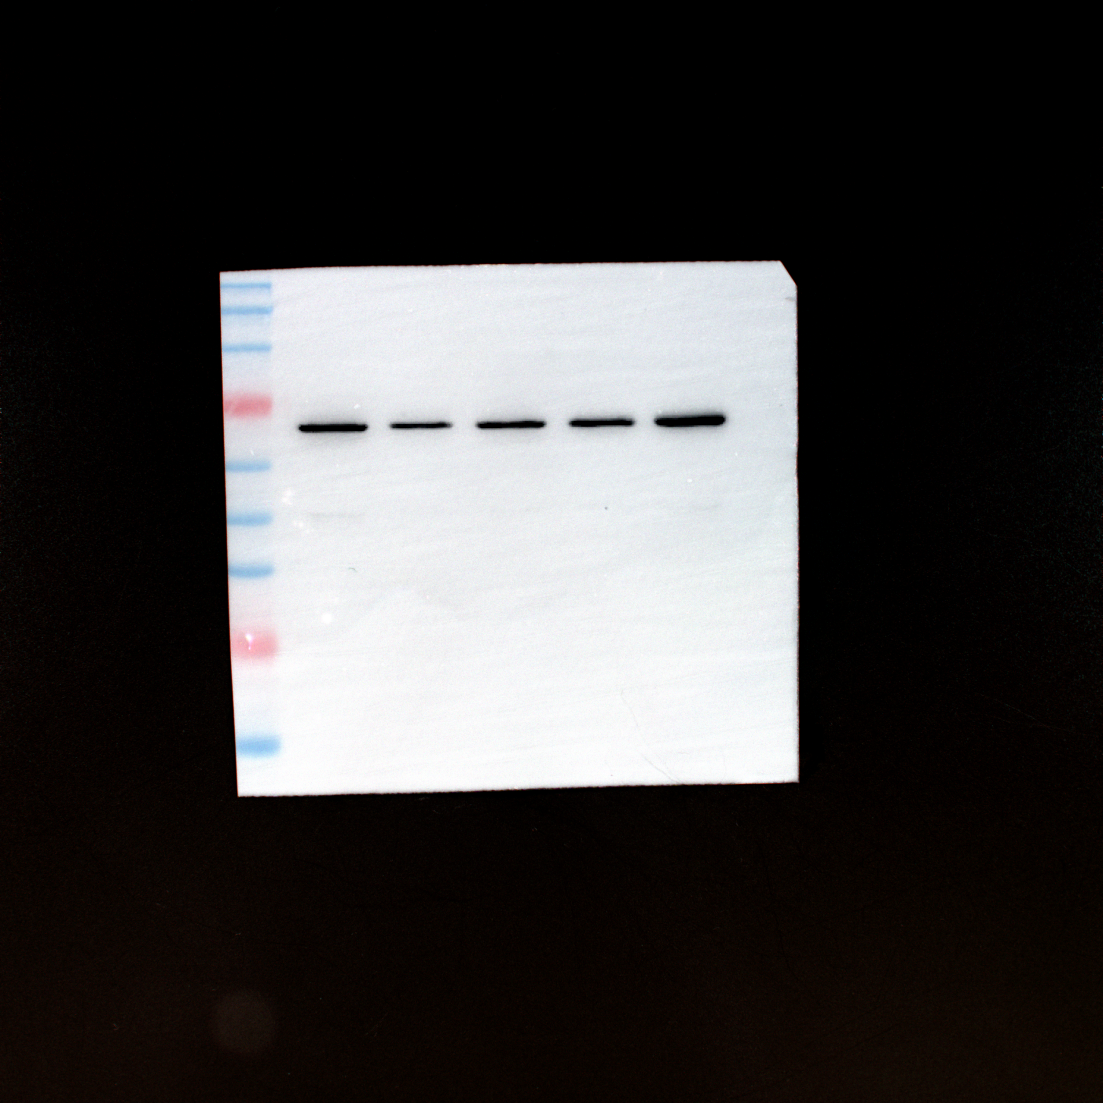

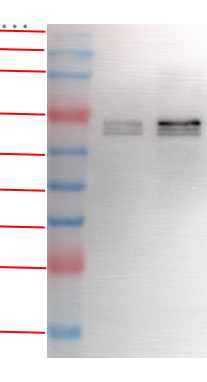


60KDa

6.p-IRS1：180KDa


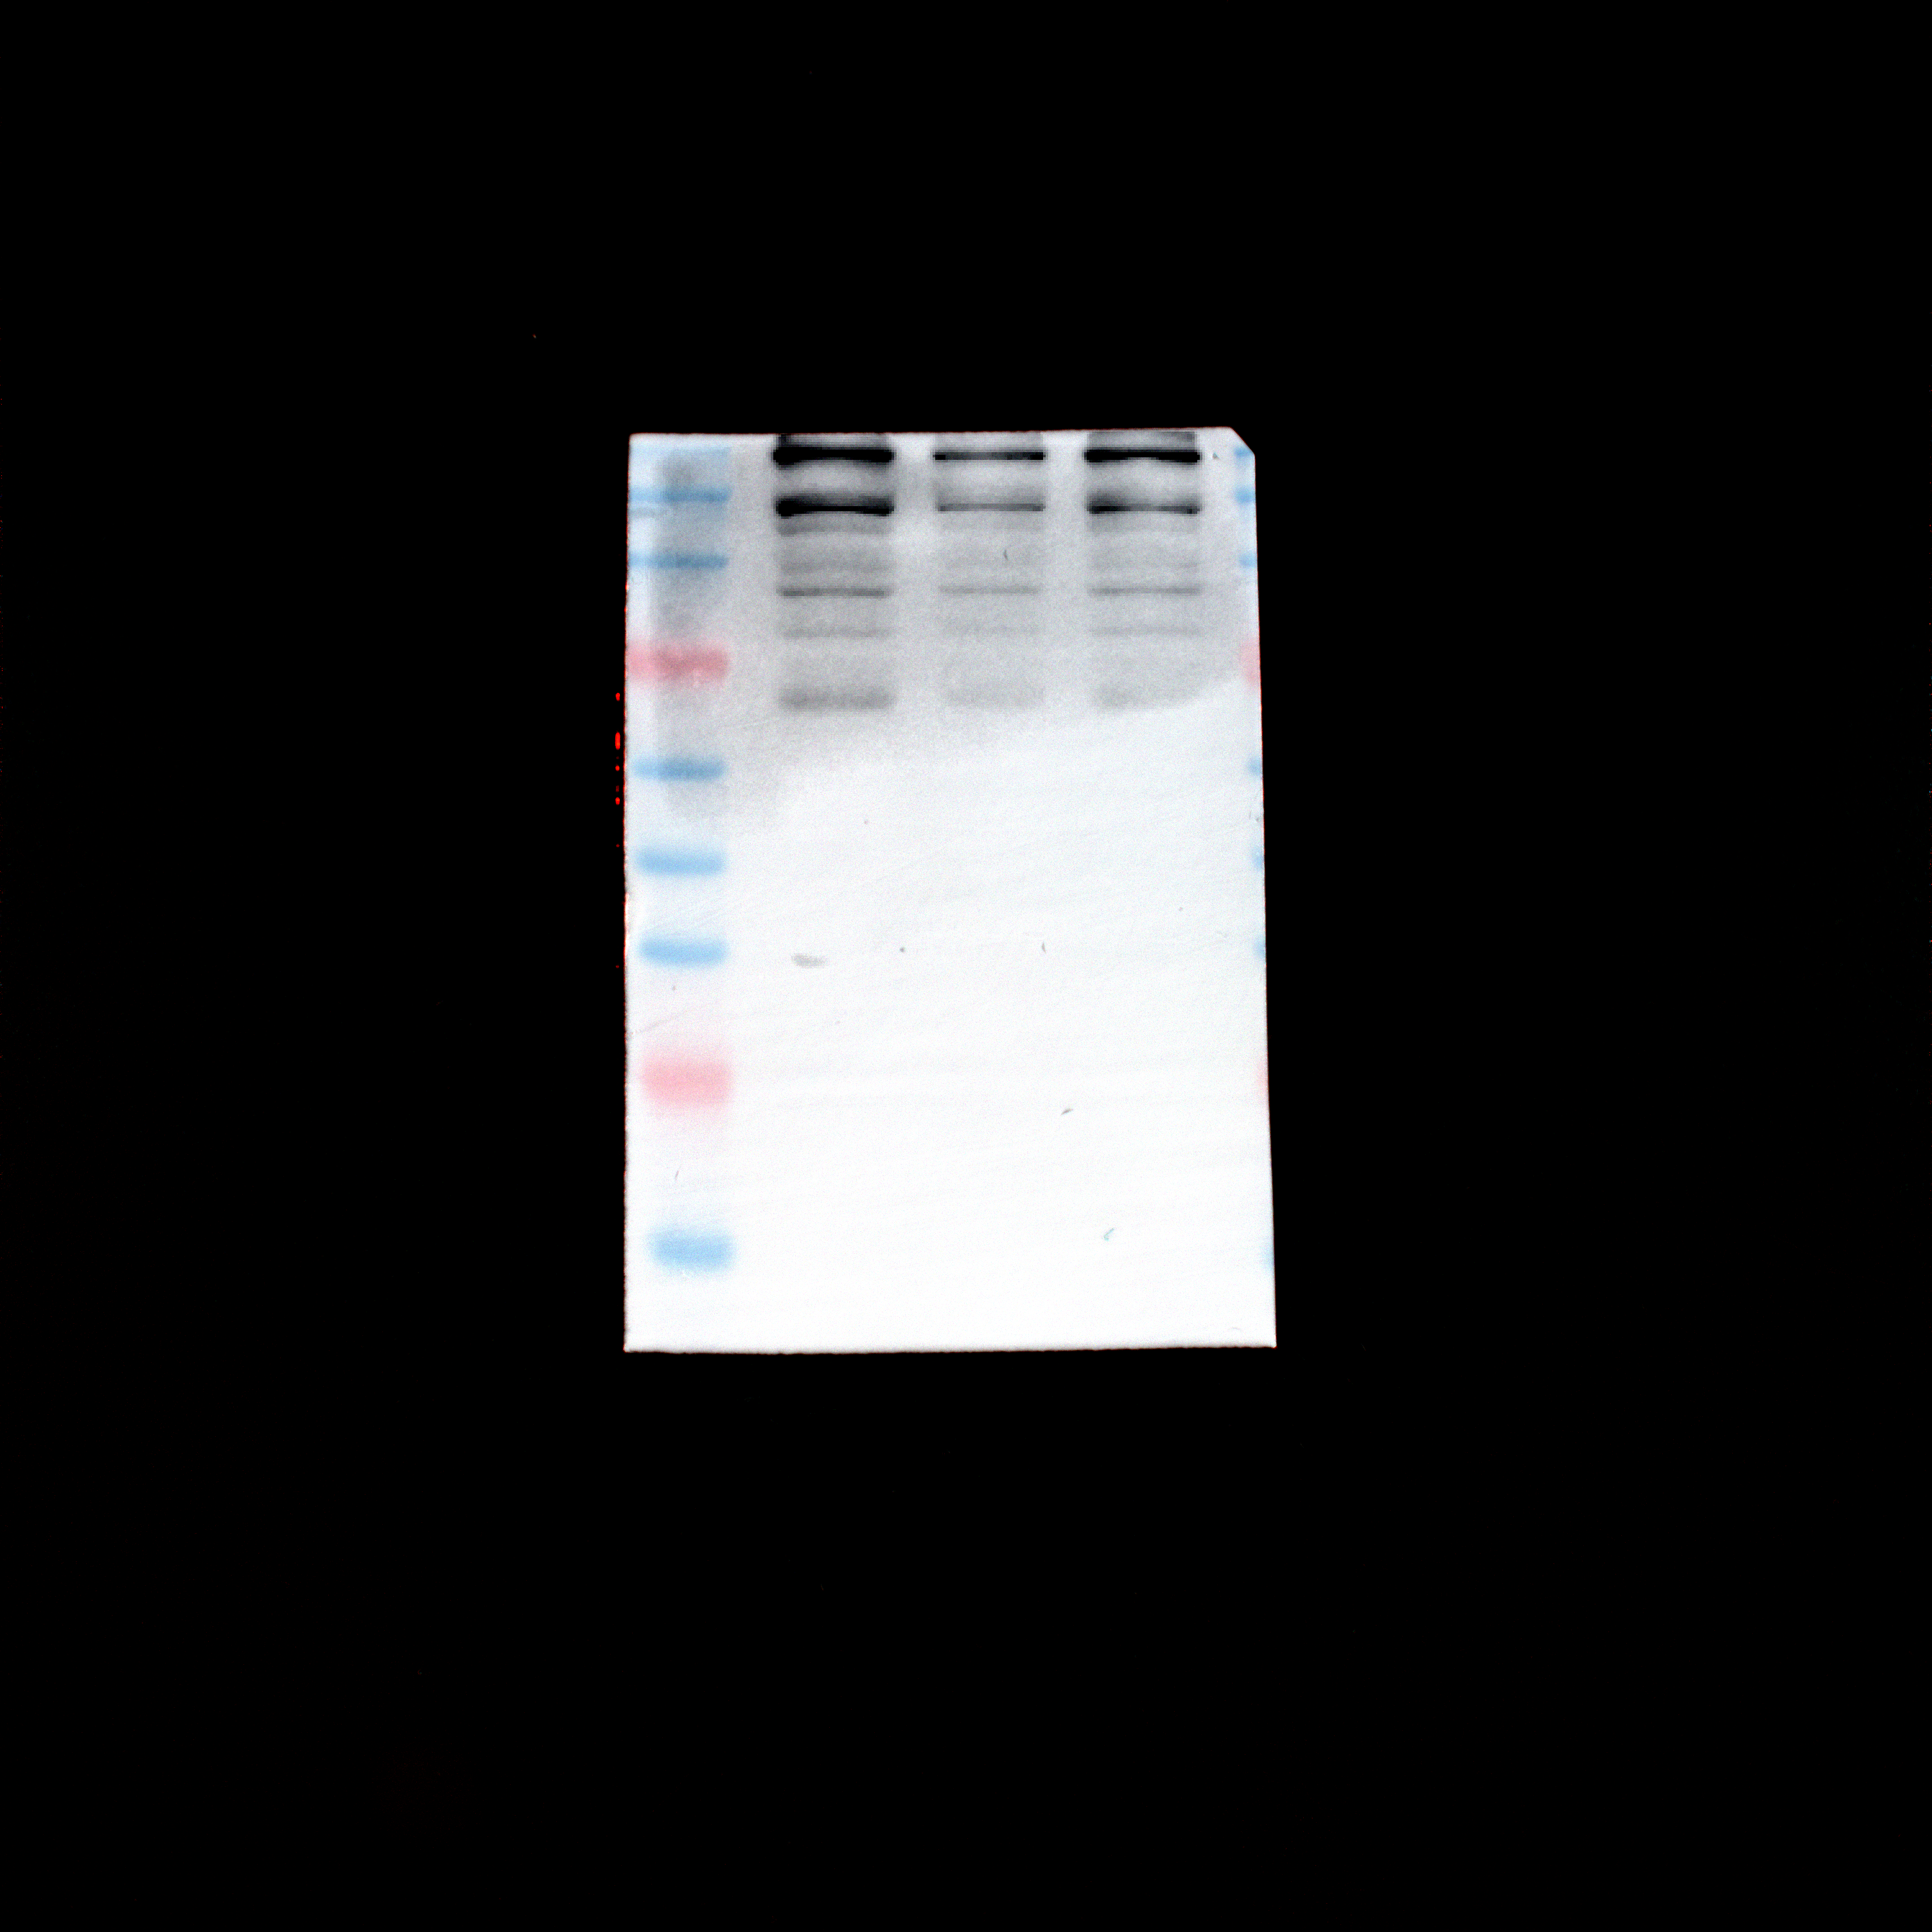
 **
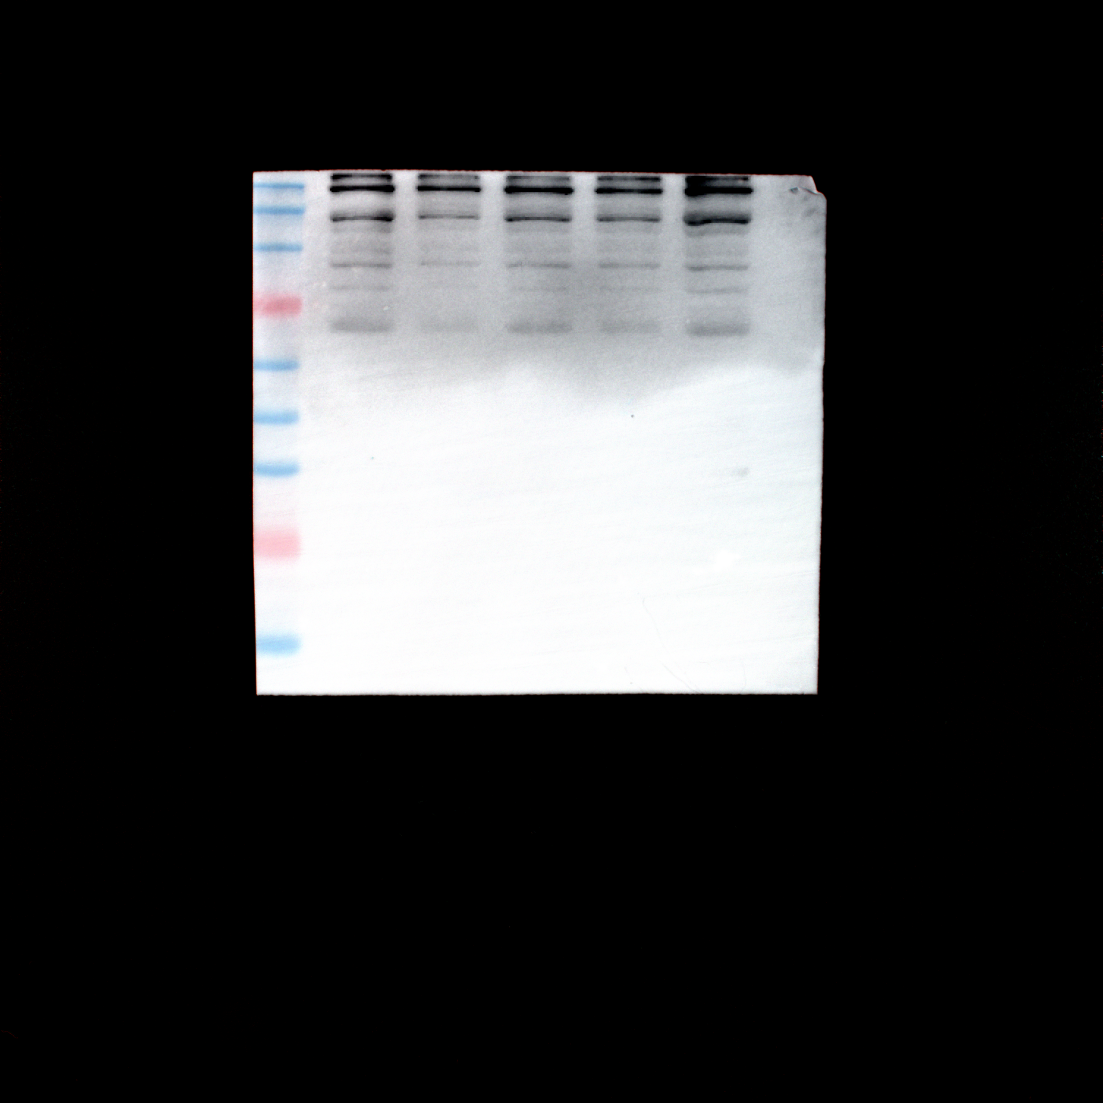
**
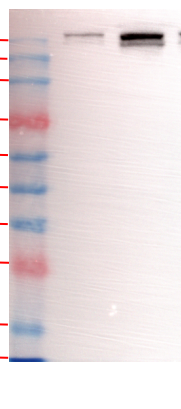


7.SOD2：25KDa

**
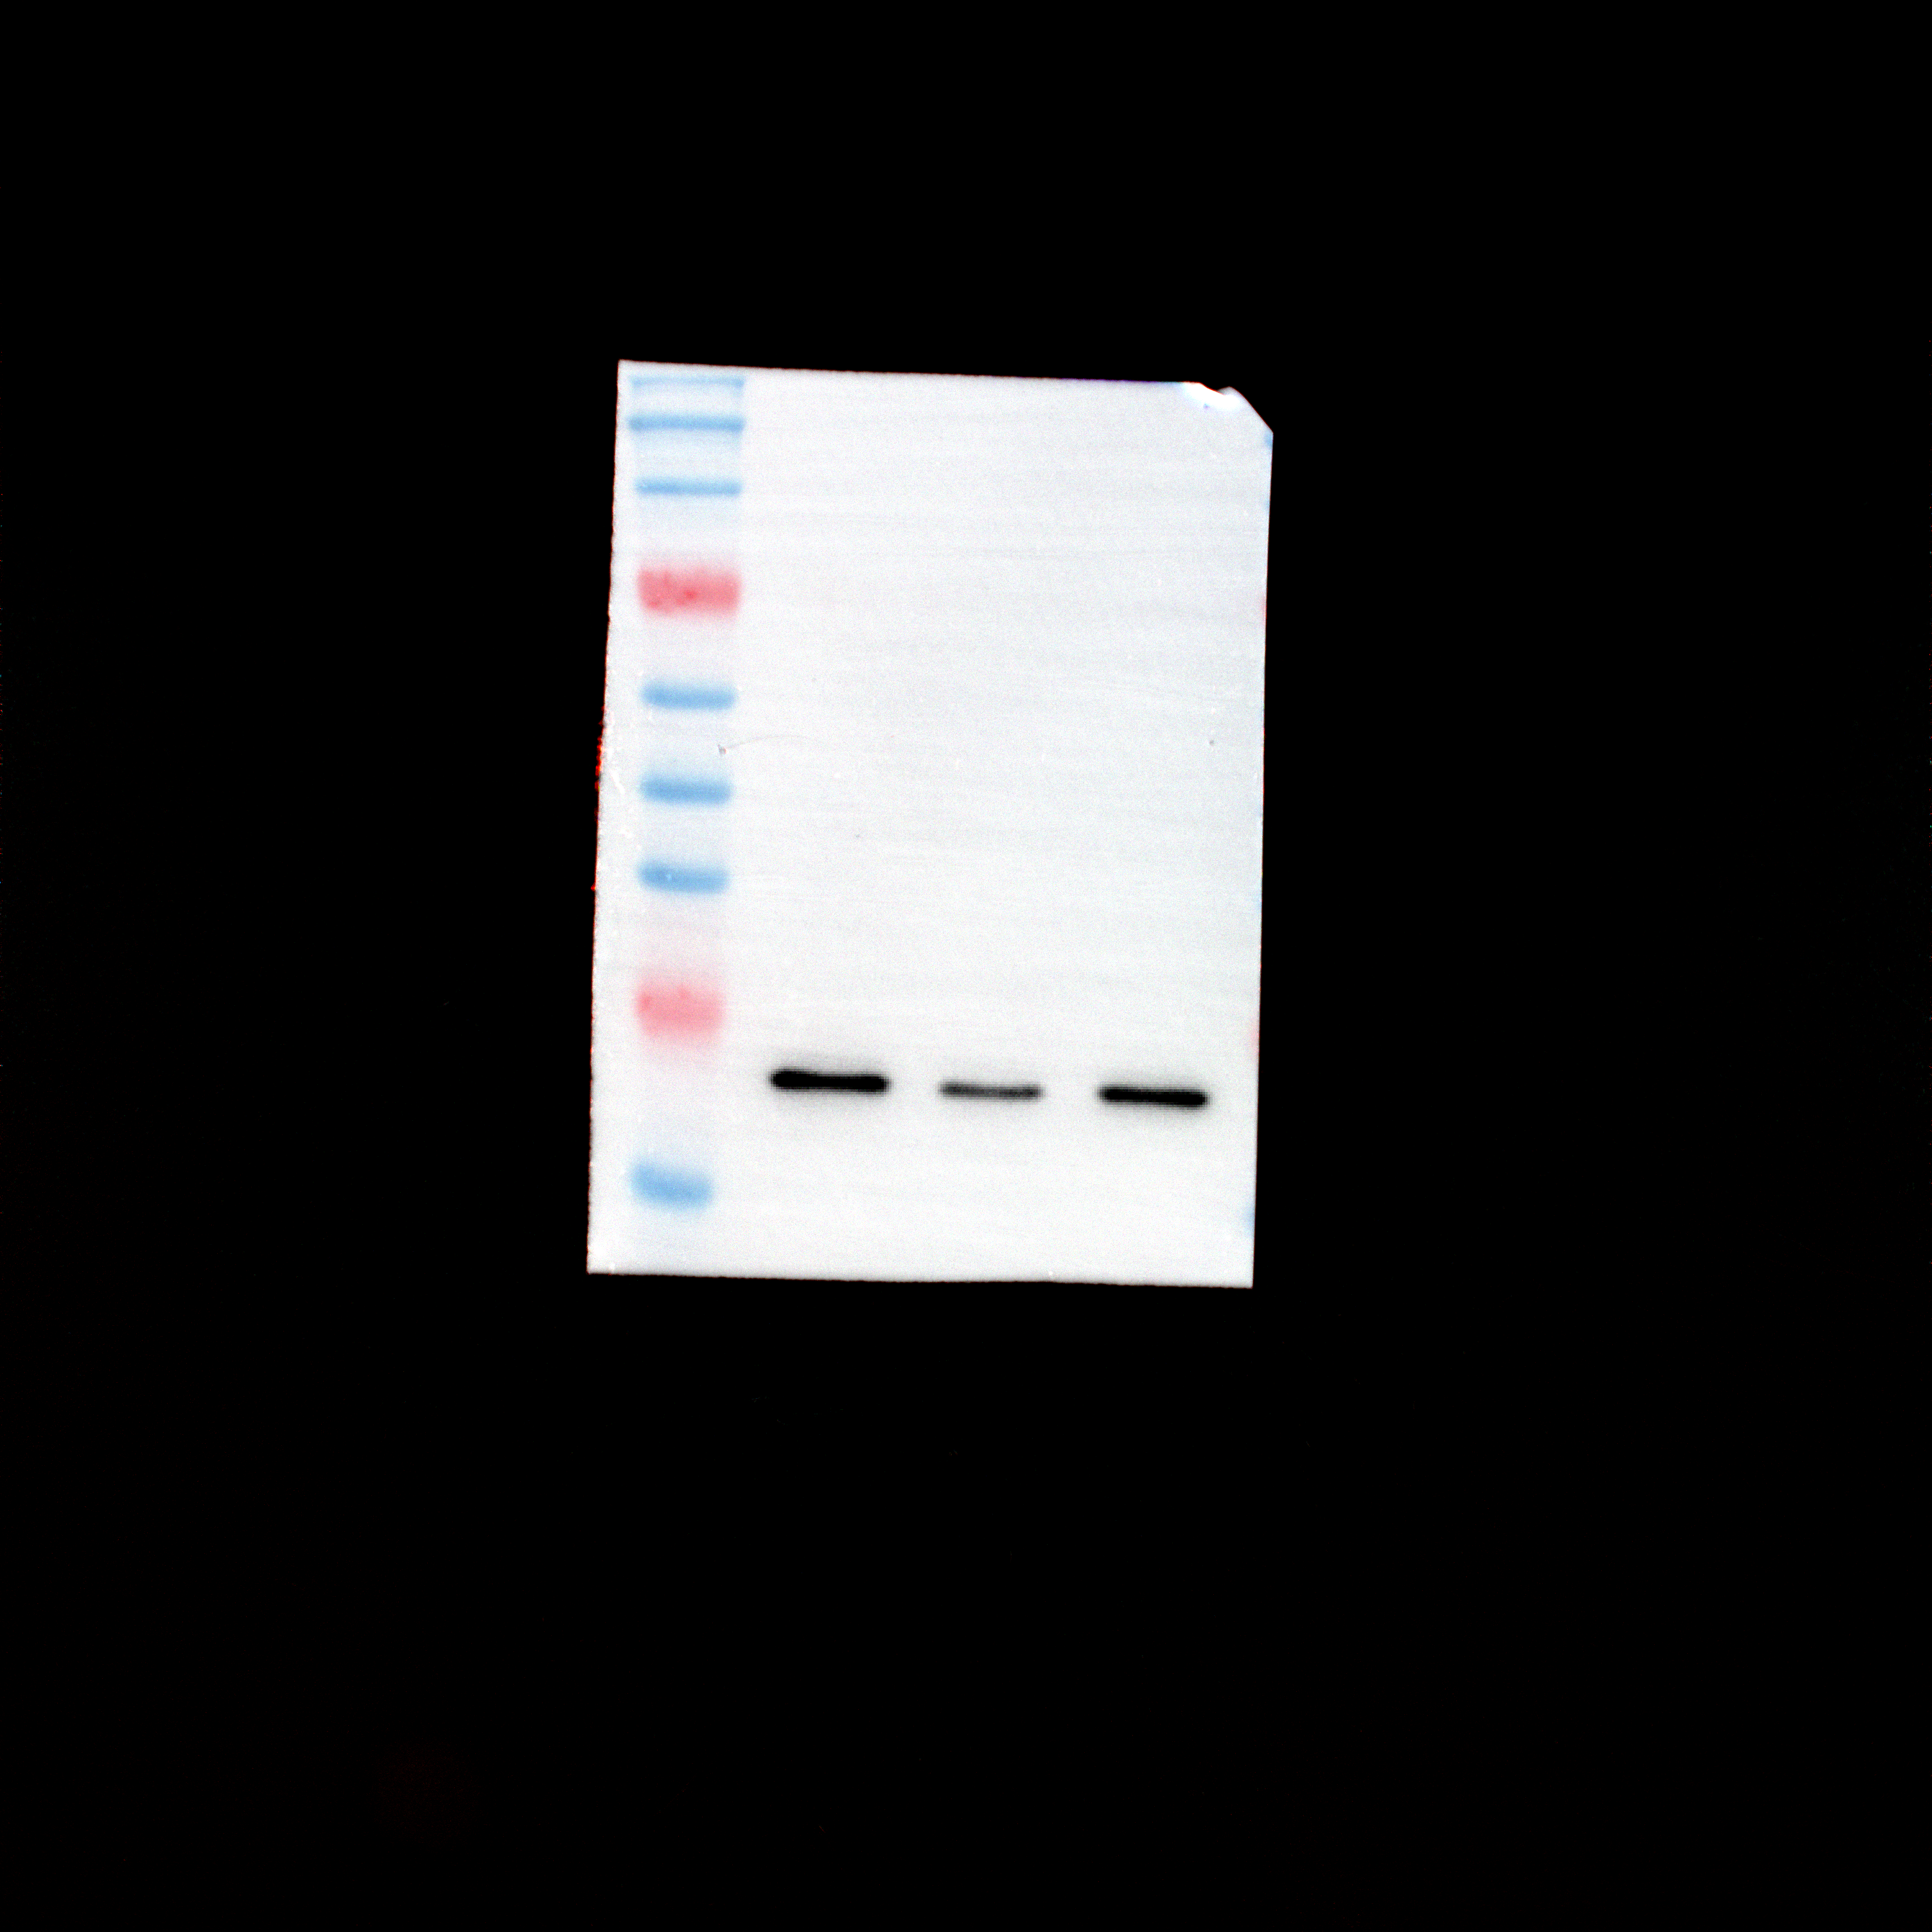

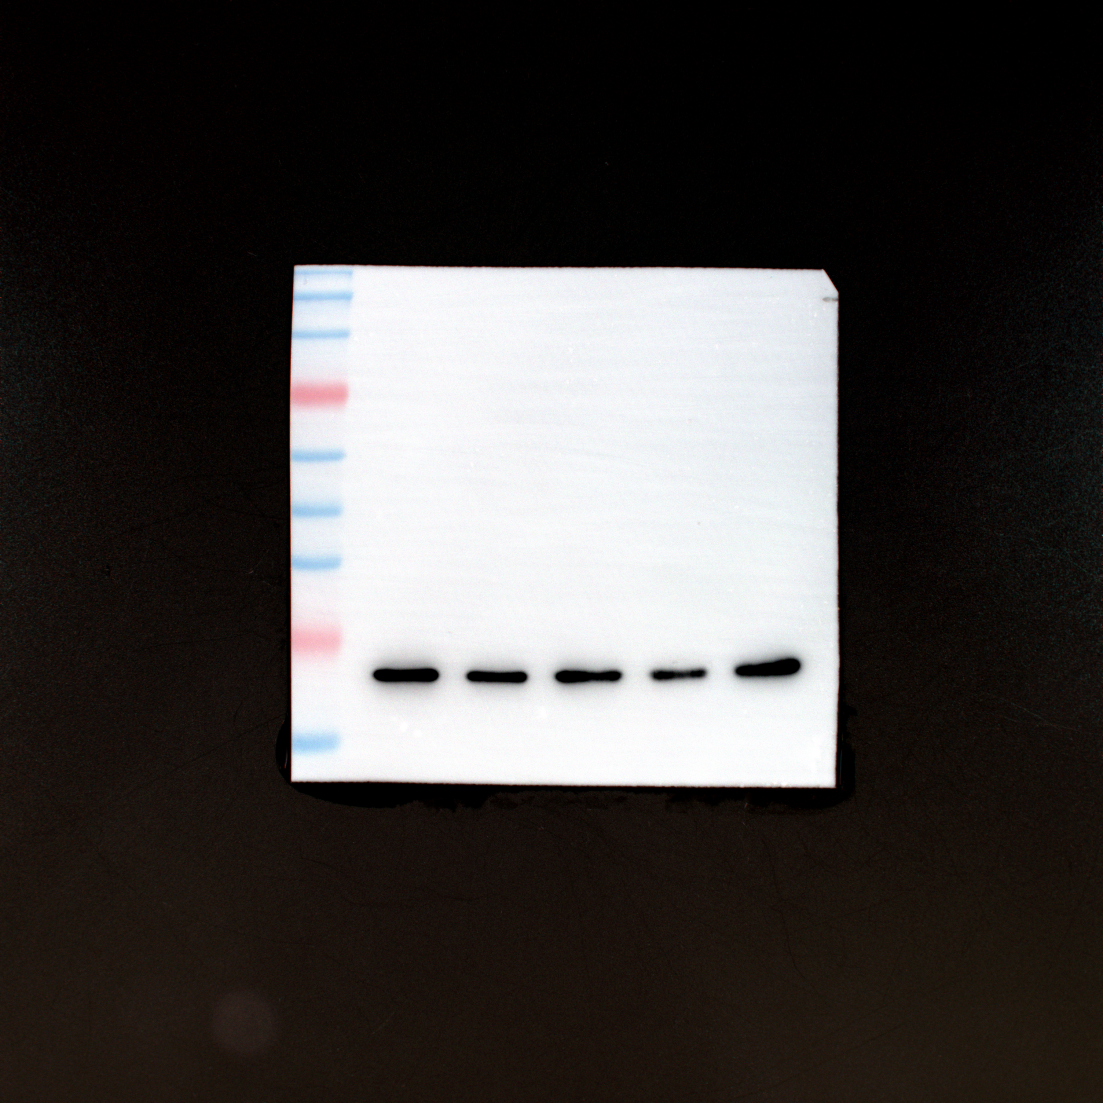
**

25KDa


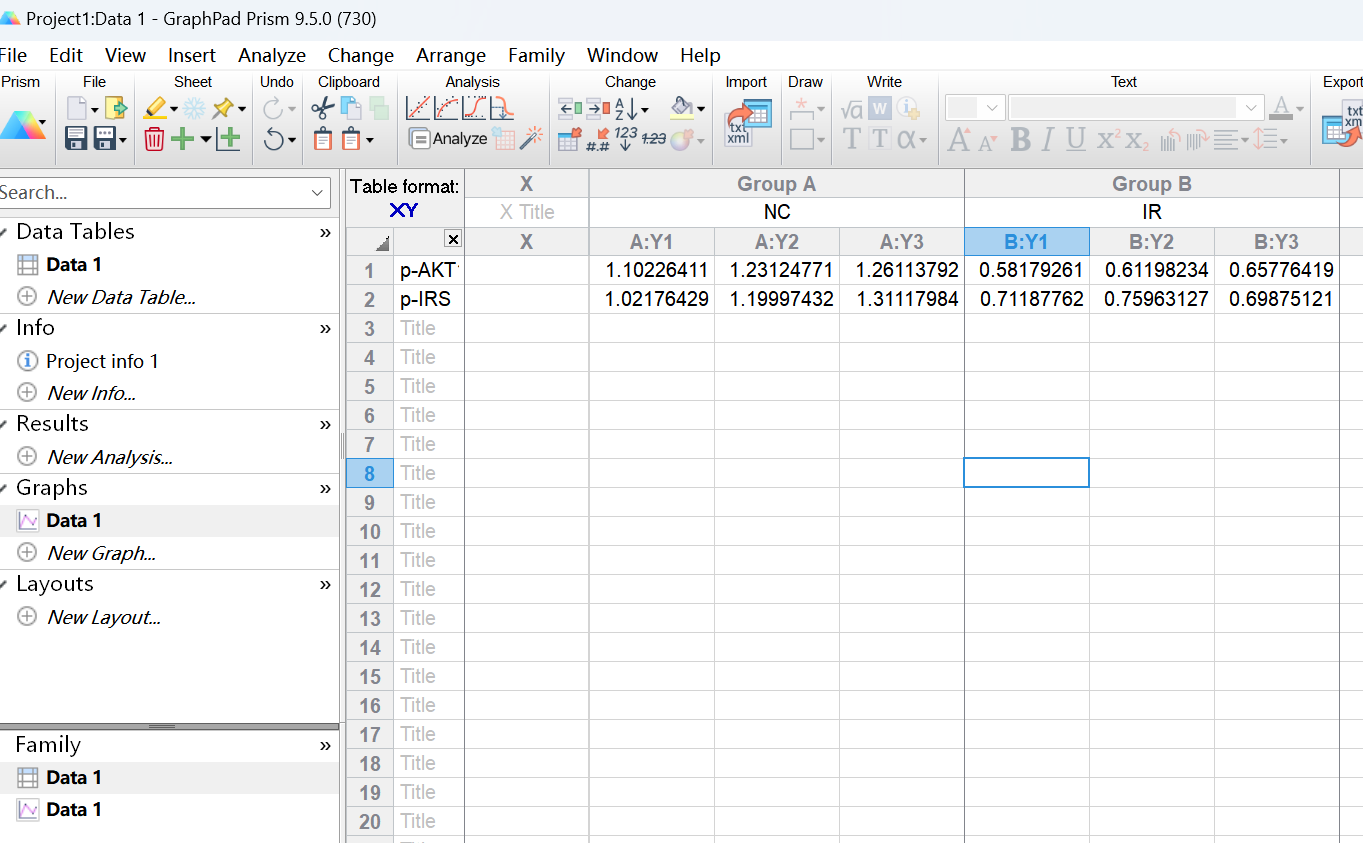

Supplement: Supplementary file 1 [file 55dcad1dd9201a3d89e0fb26.docx]
